# Supplementary material
Source: Springer Nature journal article supplement (https://www.springermedizin.de/resource/supplementary/12916_2010_363_MOESM4_ESM.pdf/9599746)
Supplement: MOESM4 [file 9599746]

# SNP probe sequences (25bp, color shows homology)

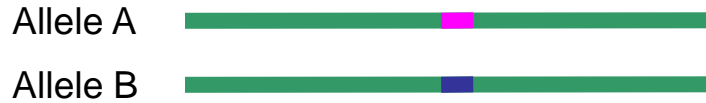

## SNP locus sequences (in an AA homozygote)

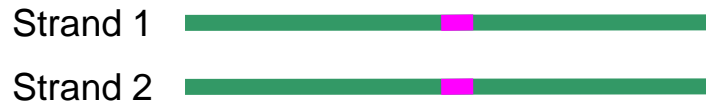

## Duplicon sequence (non-polymorphic)

Case 1, flanking sequence matches probe

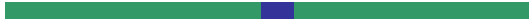

Case 2, flanking sequence does not match probe

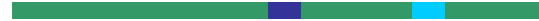

## Possible SNP locus conversion outcomes

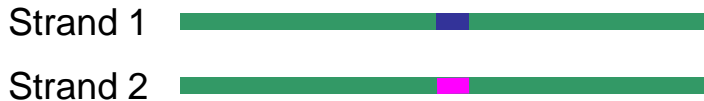

*lower A signal, higher B signal*

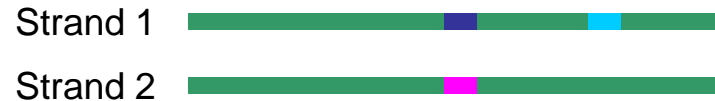

*lower A signal, unchanged B signal*
